# Supplementary material
Source: MDPI journal article supplement (https://www.mdpi.com/2073-445X/9/5/157)
Supplement: s1 [file s1]

# Supplementary Materials: Delivering climate-development co-benefits through multi-stakeholder forestry projects in Madagascar: opportunities and challenges *Land*, 2020, 9, Article No.

Nicola Favretto <sup>1,\*</sup>, Stavros Afionis <sup>2</sup>, Lindsay C. Stringer <sup>1</sup>, Andrew J. Dougill <sup>1</sup>, Claire H. Quinn <sup>1</sup>, Hery Lisy Tiana Ranarijaona <sup>3</sup>

Supplementary Materials included in this document:

**Supplementary Material 1.** List of interview questions: policy makers, scientists and academia

**Supplementary Material 2.** List of interview questions: local workers and project beneficiaries

**Supplementary Material S1.** List of interview questions: policy makers, scientists and academia

## A. Background and stakeholder analysis

- Background data on study area and project sites.
- Description of the organisation and project.
- Identify stakeholders' roles and relationships.

## B. Project objectives, achievements, drivers

- What objectives did the project(s) set - and achieve - in terms of adaptation, mitigation and development
- What are the main challenges in achieving the objectives, and the trade-offs in achieving the three dimensions?
- What are the drivers of the project objectives? Have the project objectives changed over time?

## C. Community engagement

- When did you first engage the local communities?
- How did you decide which communities to work with, how did you make sure that everyone is represented, how did you engage with them, how do you mainstream community perspectives in your operations? What role community members play in project development and implementation? What will their role be in the project's long-term sustainability?

## D. Project monitoring and evaluation

- Who is charged with the overall monitoring of the project? How and at what frequency is the project monitored, what methods and metrics are used?

## E. Policy implications

- What are the government's goals/priorities for the sectors related to the project's desired outcomes? How does the project align with these goals?
- What lessons can be learnt from your project? Can they be replicated elsewhere?
- Who are the relevant people who should be engaged in such process? Are you in direct contact with them, or what do you think would be the best channels to share your lessons and ensure effective communication?

**Supplementary Material S2.** List of interview questions: local workers and project beneficiaries

- Name, gender, age
- For how long have you been living in this village? (if recently moved: why did you move here?)
- When did you get involved with the project?
- How did you discover about them?
- How did you get this job?
- Do you know what the projects does, why are they here, and what kind of problems are they trying to solve? Why are they doing what they do, and what are they trying to achieve?
- Do you think it works? What are the main difficulties?
- What are your duties within the project?
- Did you receive any training (if so, from whom and how long was it)? Did you learn anything new since you've got involved?
- Do you expect the project to stay for many years to come, or do you think that it might end soon?
- Let's imagine that the project ends tomorrow. Could you apply the new knowledge and skills that you've gained so far to continue this work? If so, how and where?
- What are the benefits that you and your family derive from this project?
- Do you have other ways of sustaining your living outside this project?
- How did you sustain your living before the project started?
- What do you expect from the project in the future?
- If you have any question or issue that you want to discuss about the project, who do you talk to? Is he/she always available and easy to approach? How often do you see him/her?
- Is there any environmental problem that your village is facing? What are the causes?
- Do you think that the health of your forest has changed over time? If so, do you know why it has changed?
- Has the quantity of related ecosystem services (e.g. fish, wood, water, etc.) decreased, or has it remained the same over the past 10 years?
- Do you think that the climate has changed over the past 10 years (rainfall quantity, intensity, temperature)? If changed, do think that these changes have an impact on the health of your land and forest? How?
- How have you adapted to the changes in the environment to keep sustaining your living?
- Are there other problems that your community is facing? Do you think that the project can help address these problems? How?
- Is there anything that you would like to improve in the project?
- Is there any other aspect that you wish to discuss?
